# Supplementary material for: Asymmetric total synthesis of diosniponols A and B
Source: Royal Society of Chemistry journal article supplement (doi:10.1039/d3ob00863k), 2023-01-01

## Supporting information

### Asymmetric Total Synthesis of Diosniponols A and B

Deepak Saini, Dashrath Jangid and Rodney A. Fernandes\*  
Department of Chemistry, Indian Institute of Technology Bombay, Powai  
Mumbai 400076, Maharashtra, India

<sup>1</sup>H and <sup>13</sup>C NMR spectra and HRMS spectra of all compounds

S2–S24

<sup>1</sup>H NMR (400 MHz, CDCl<sub>3</sub>) and <sup>13</sup>C{<sup>1</sup>H} NMR (100 MHz, CDCl<sub>3</sub>) of compound 6

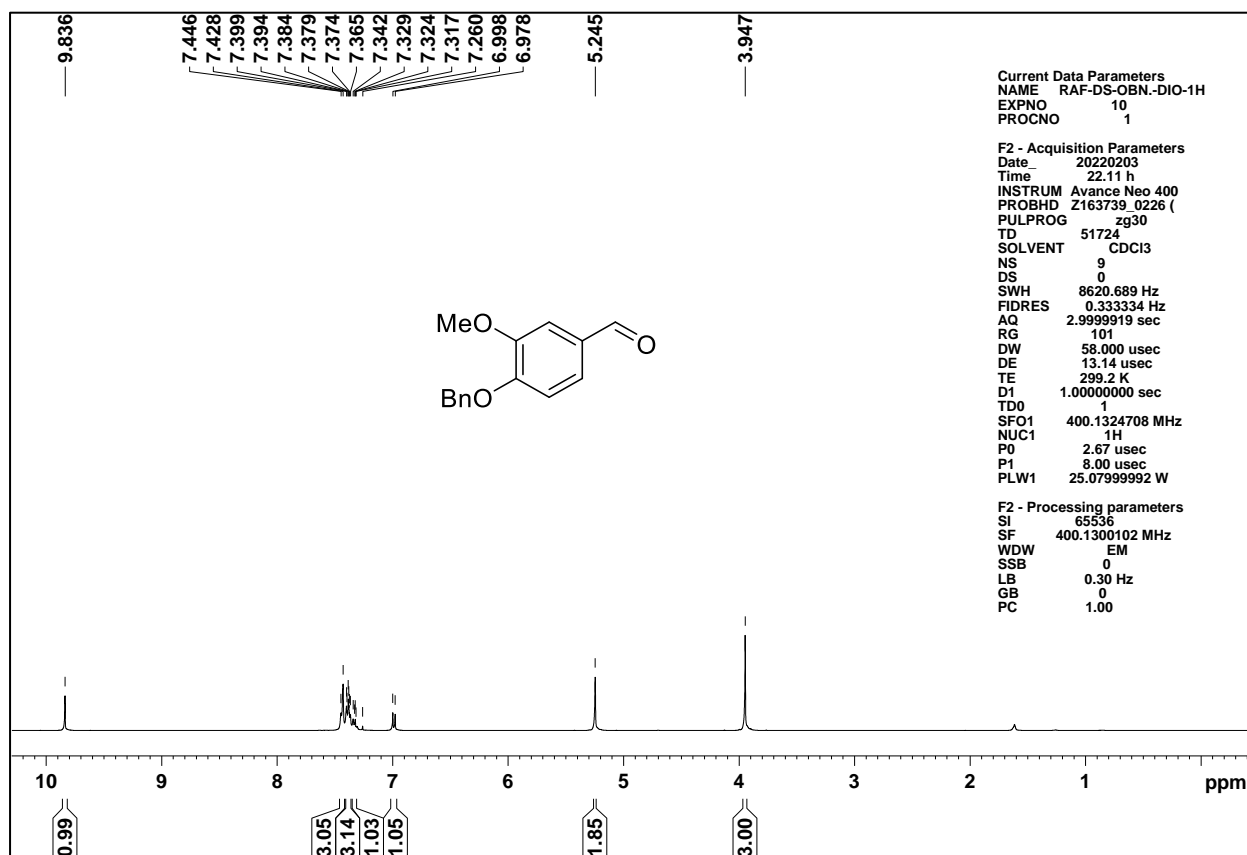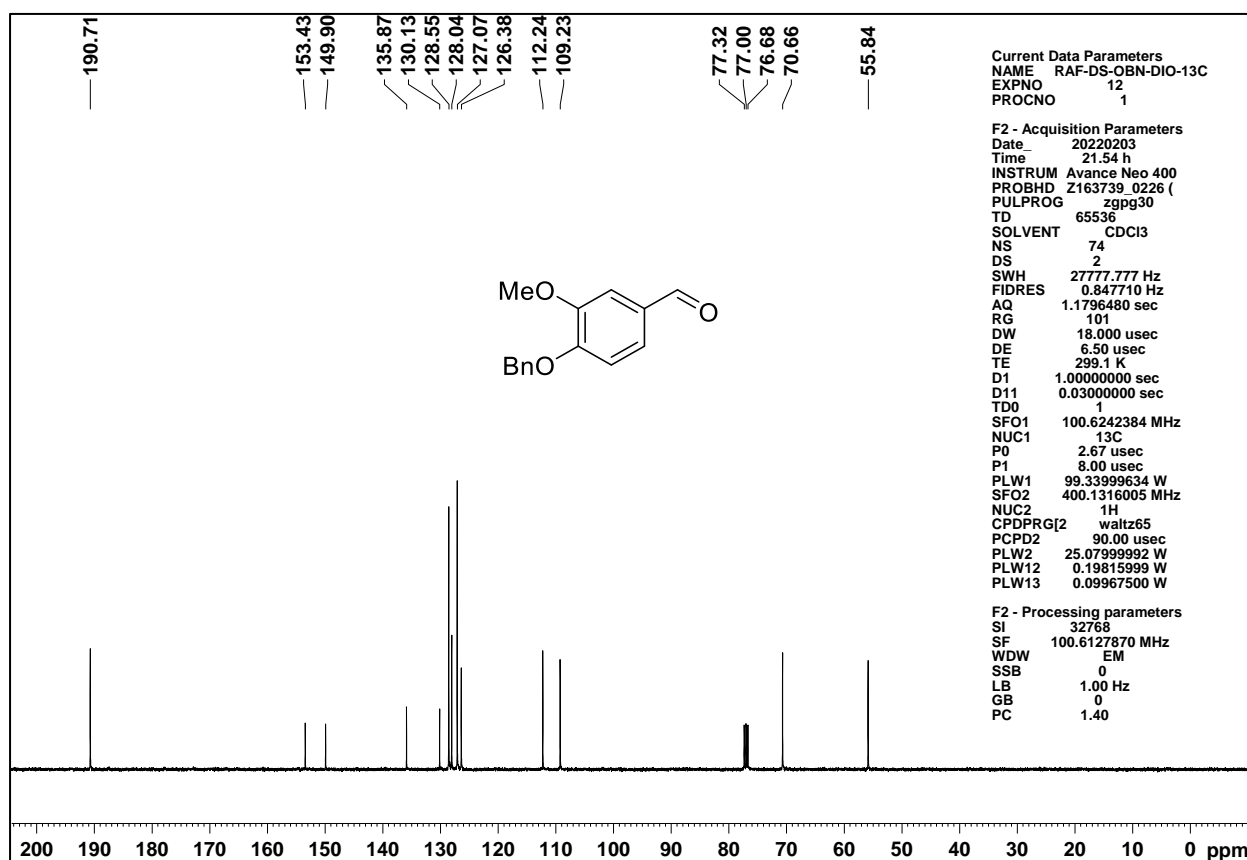

**6:** HRMS (ESI-TOF)  $m/z$ :  $[M + Na]^+$  calcd for  $C_{15}H_{14}O_3Na$  265.0835, found 265.0840.

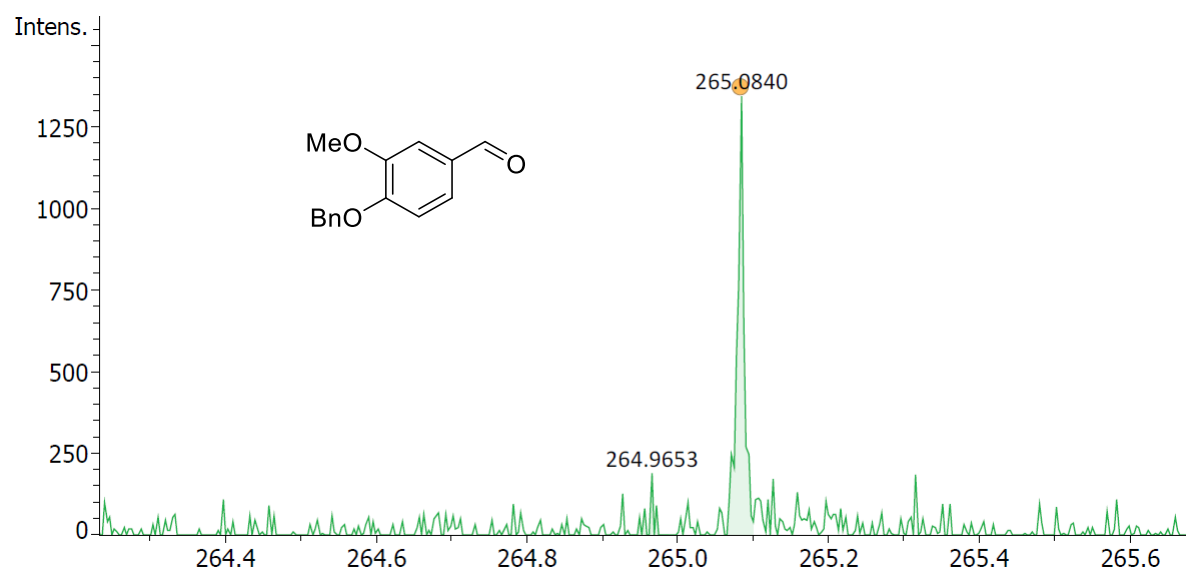

$^1\text{H}$  NMR (400 MHz,  $\text{CDCl}_3$ ) and  $^{13}\text{C}\{^1\text{H}\}$  NMR (100 MHz,  $\text{CDCl}_3$ ) of compound 7

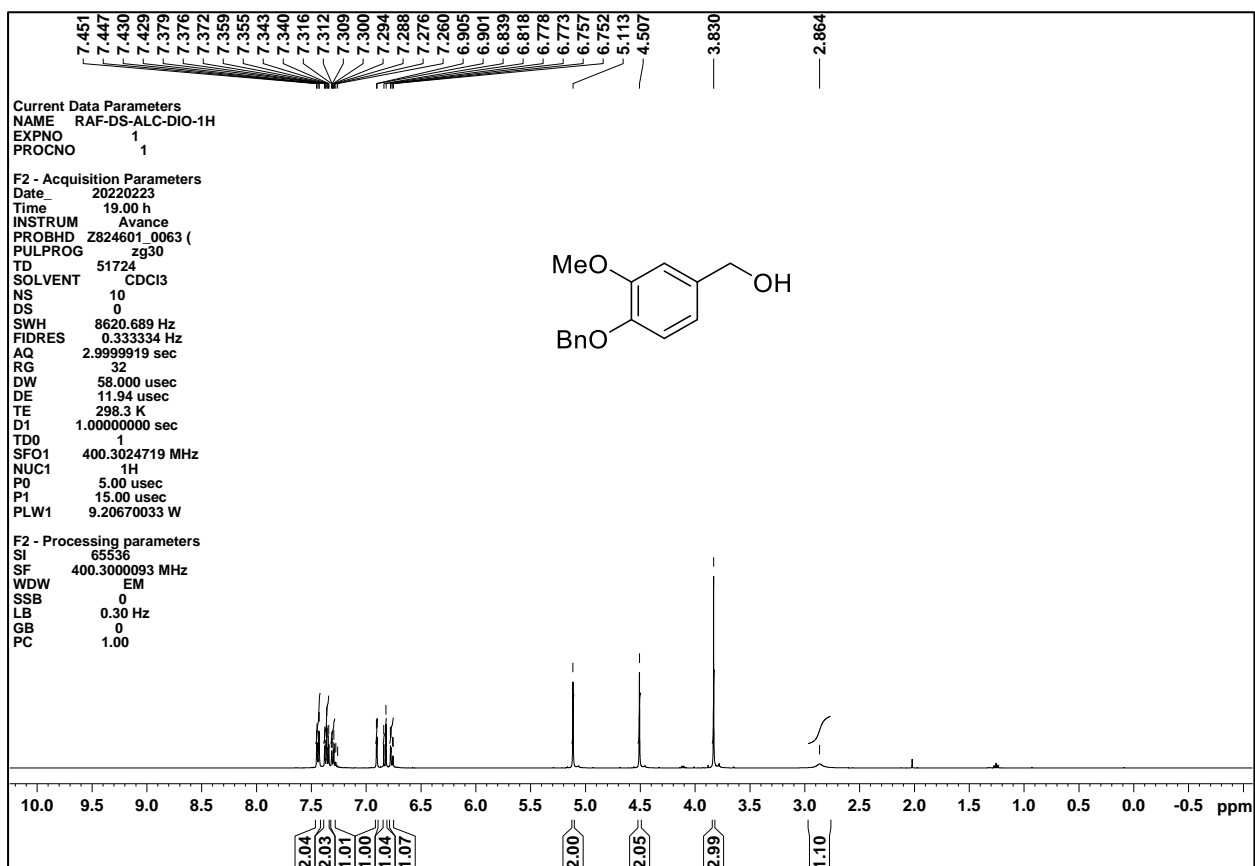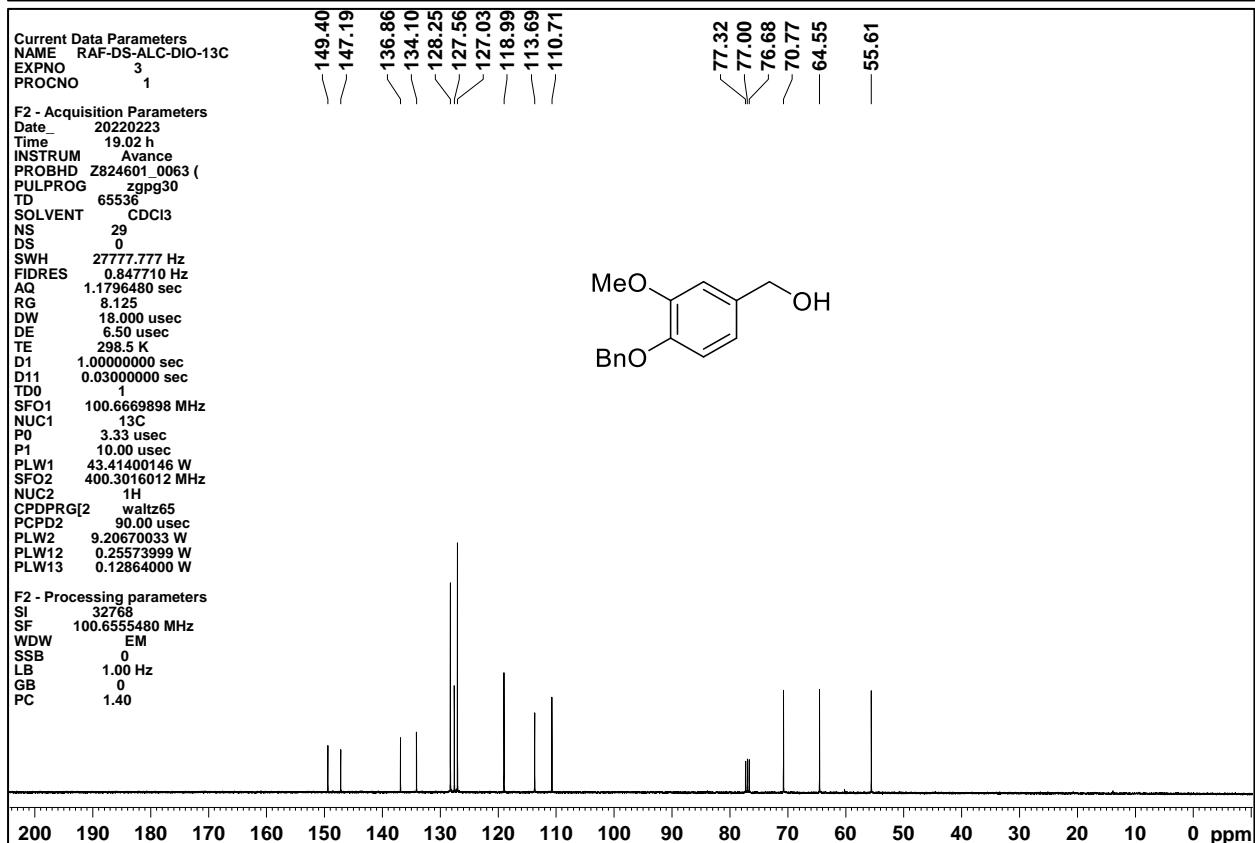

**7:** HRMS (ESI-TOF)  $m/z$ :  $[M + Na]^+$  calcd for  $C_{15}H_{16}O_3Na$  267.0992, found 267.0989.

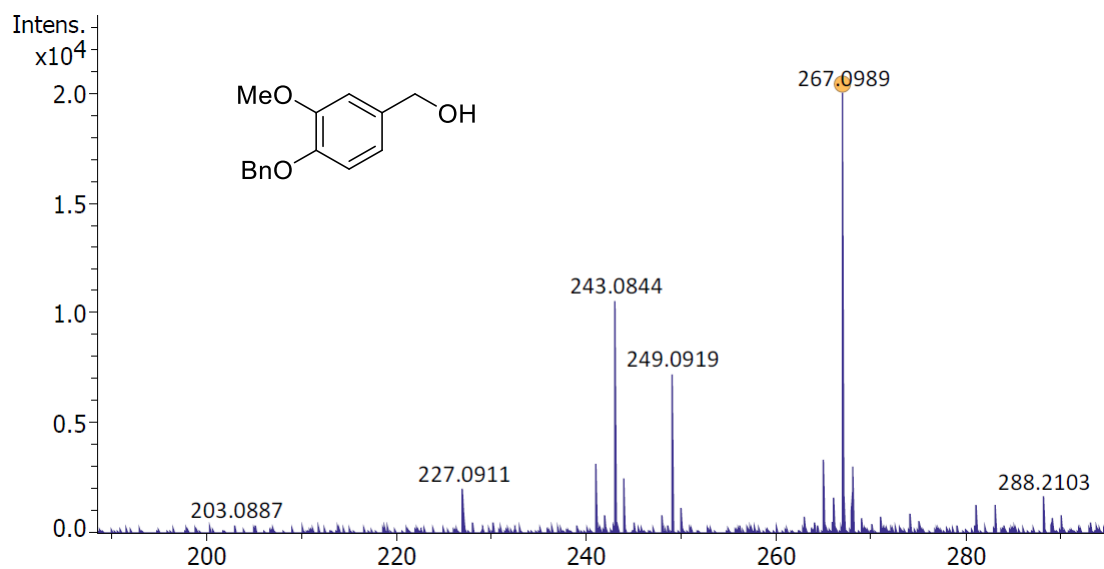

$^1\text{H}$  NMR (400 MHz,  $\text{CDCl}_3$ ) and  $^{13}\text{C}\{^1\text{H}\}$  NMR (100 MHz,  $\text{CDCl}_3$ ) of compound **8**

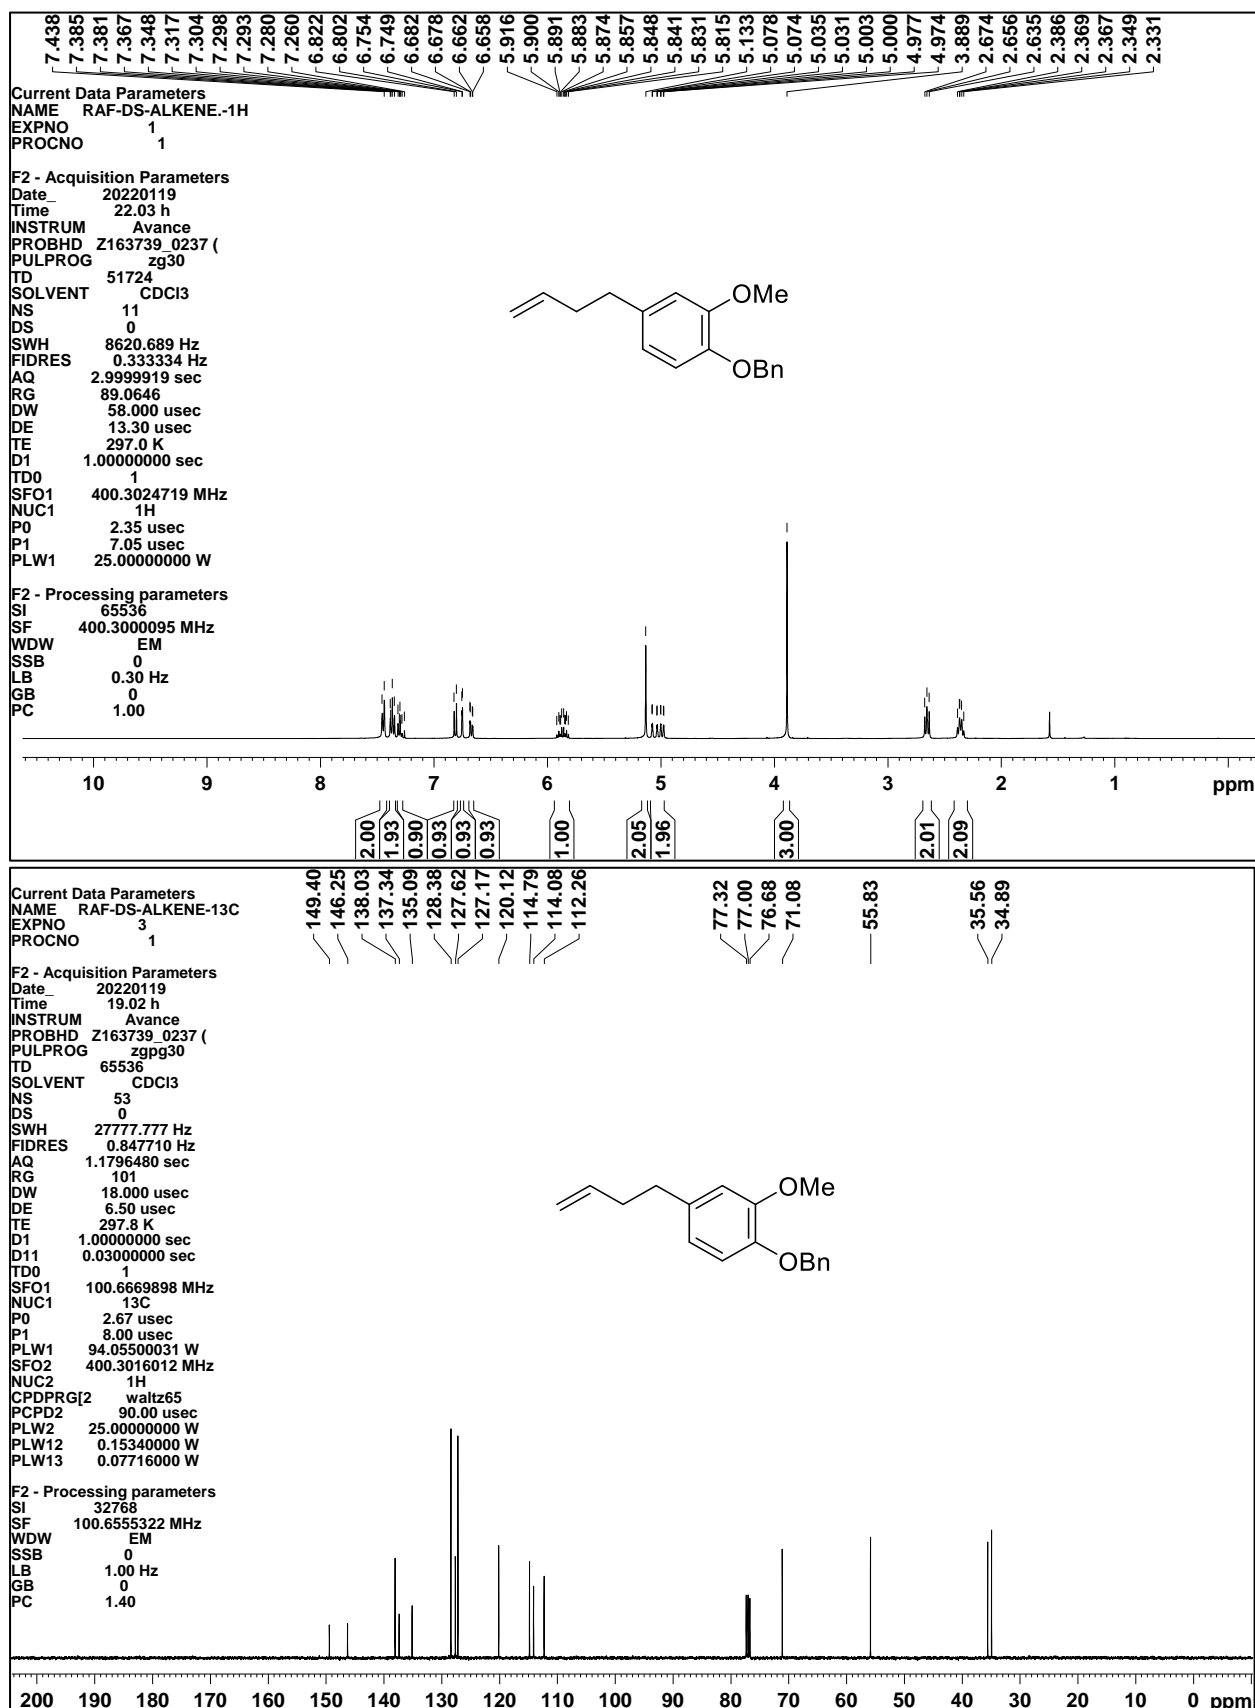

8: HRMS (ESI-TOF)  $m/z$ :  $[M + H]^+$  calcd for  $C_{18}H_{21}O_2$  269.1536, found 269.1536.

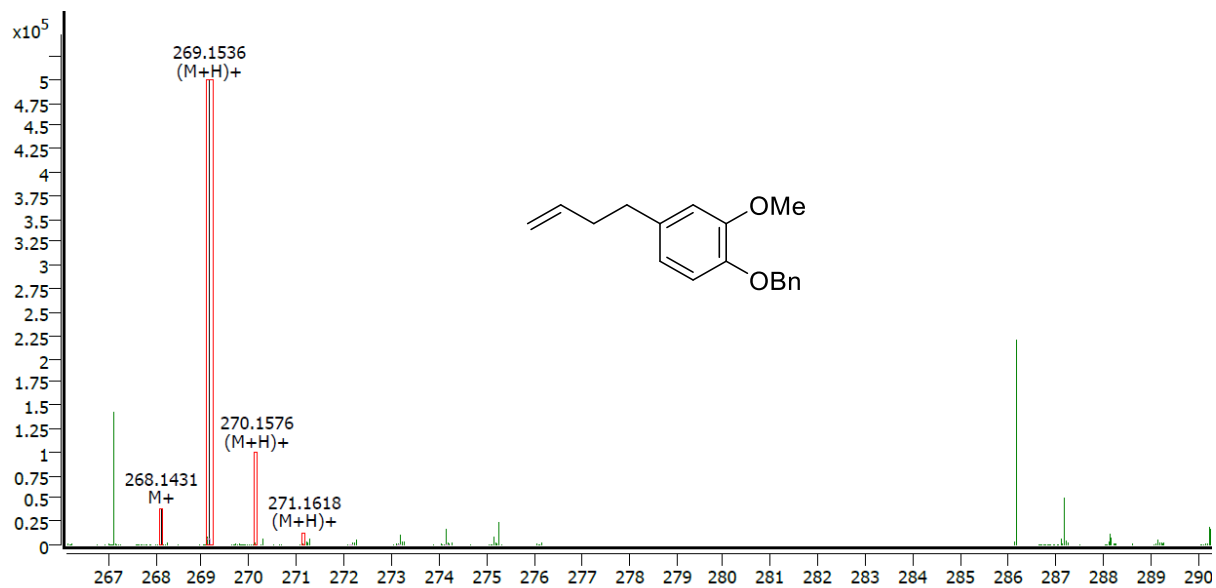

<sup>1</sup>H NMR (400 MHz, CDCl<sub>3</sub>) and <sup>13</sup>C{<sup>1</sup>H} NMR (100 MHz, CDCl<sub>3</sub>) of compound (±)-4

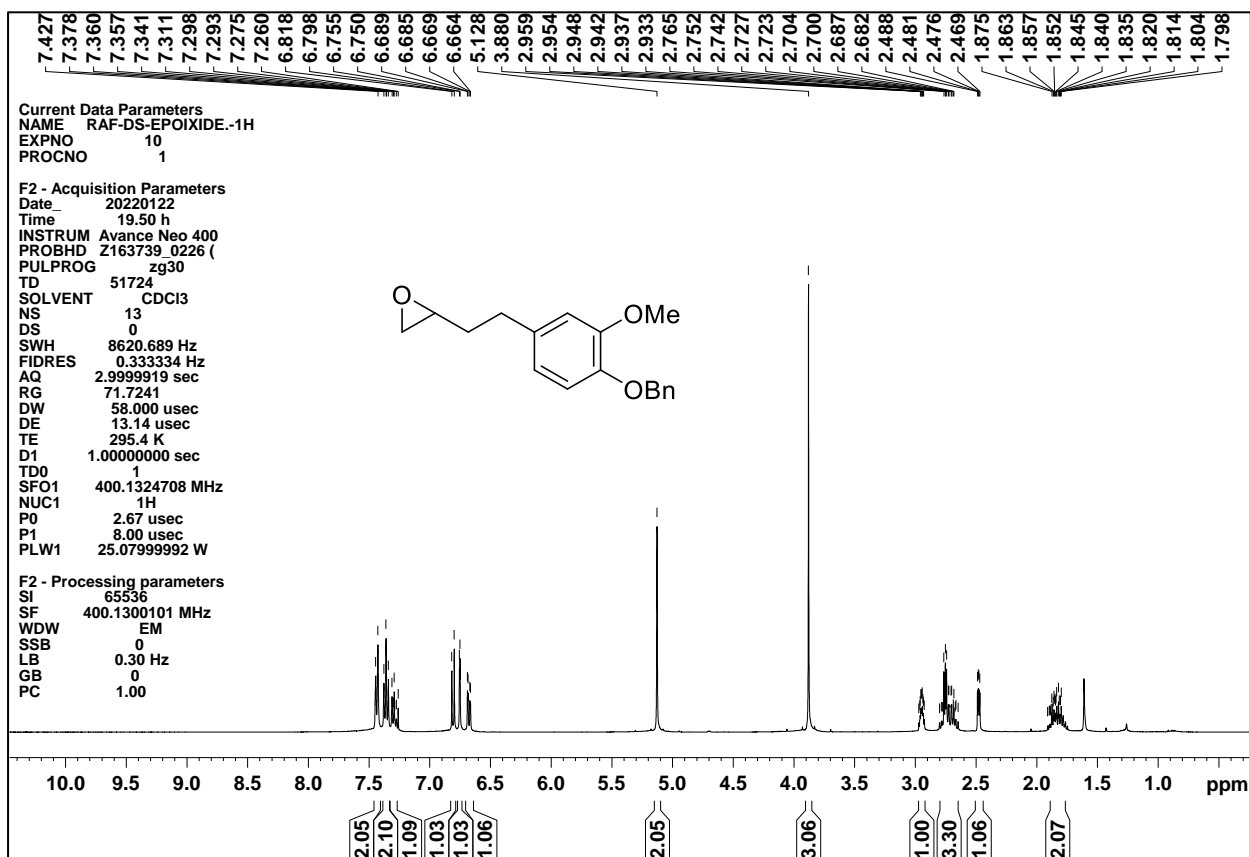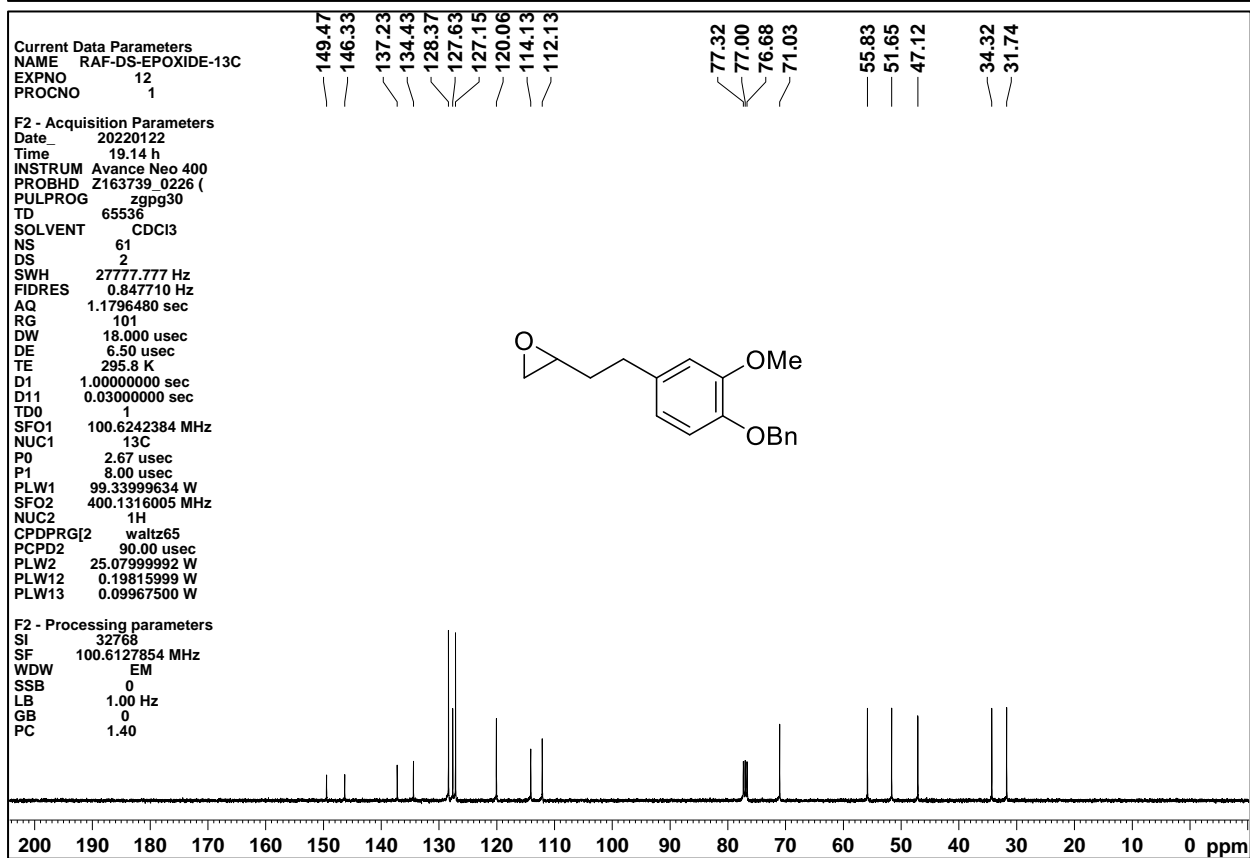



**(±)-4:** HRMS (ESI-TOF)  $m/z$ :  $[M + Na]^+$  calcd for  $C_{18}H_{20}O_3Na$  307.1305, found 307.1302.

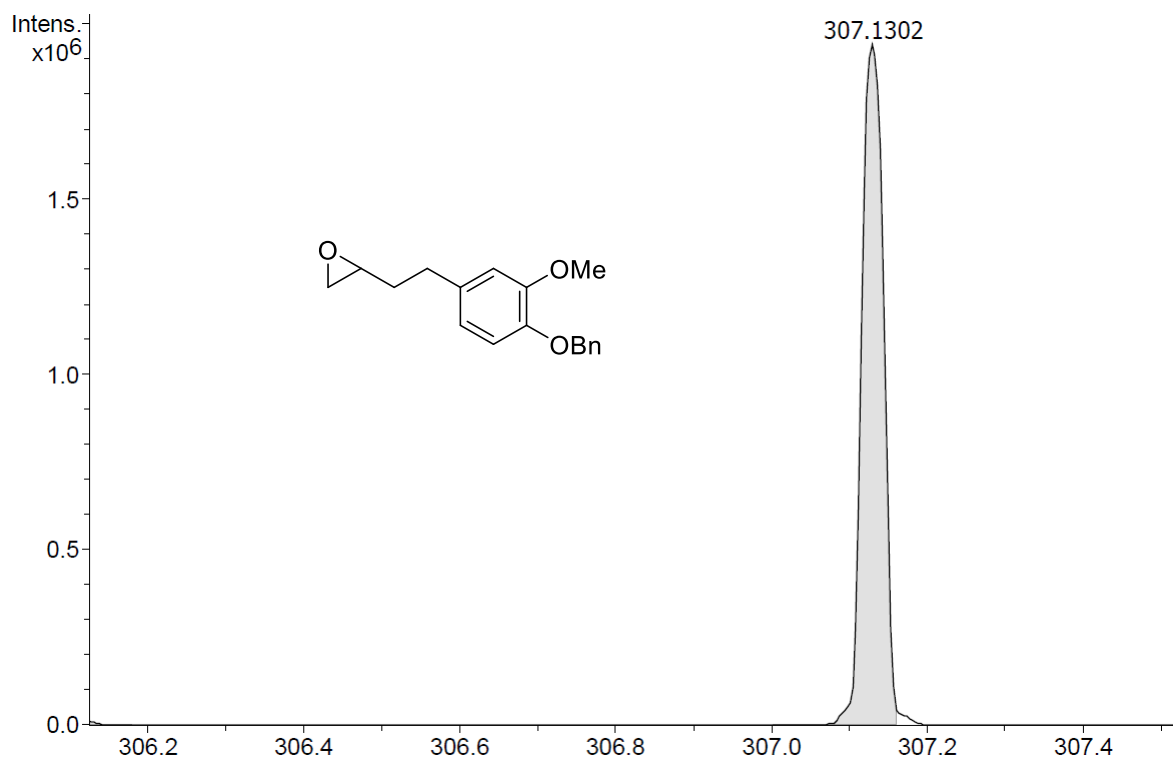

<sup>1</sup>H NMR (400 MHz, CDCl<sub>3</sub>) and <sup>13</sup>C{<sup>1</sup>H} NMR (100 MHz, CDCl<sub>3</sub>) of compound 4

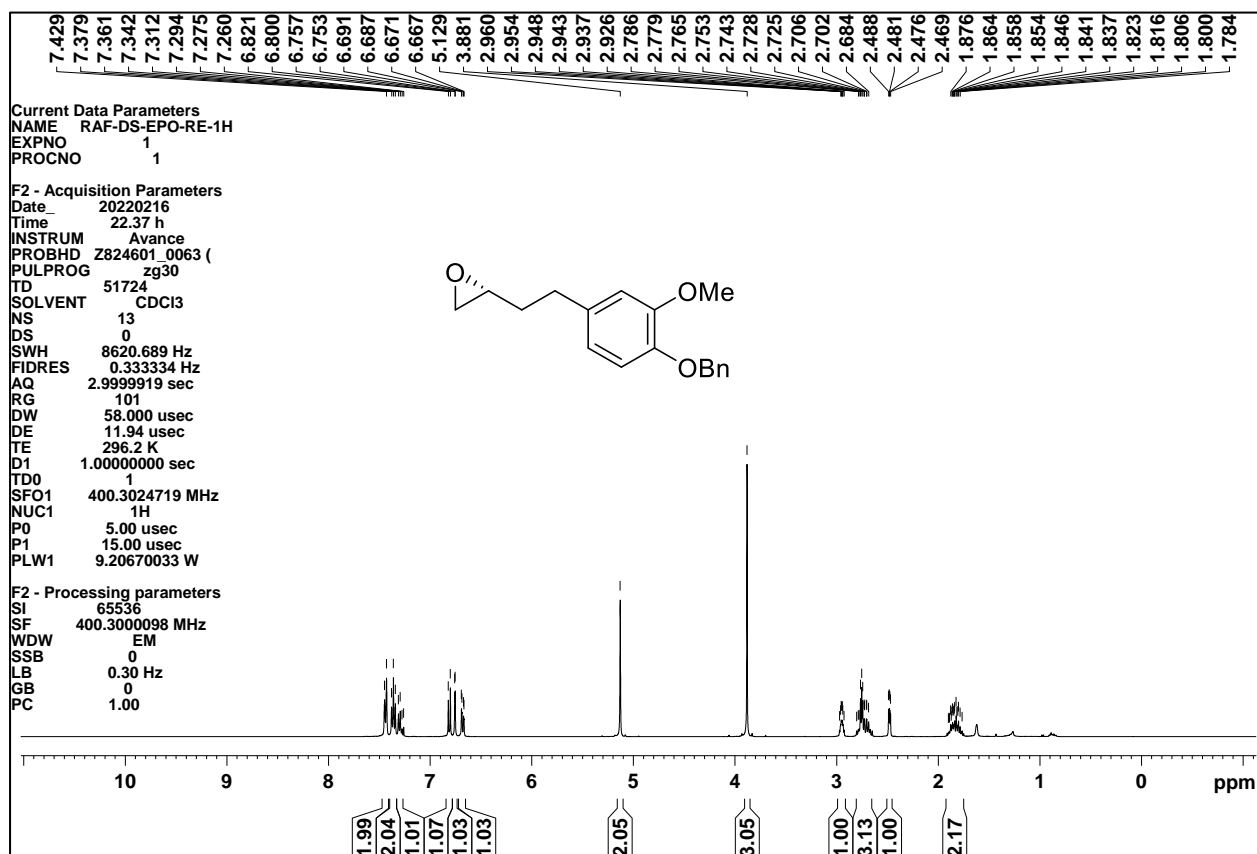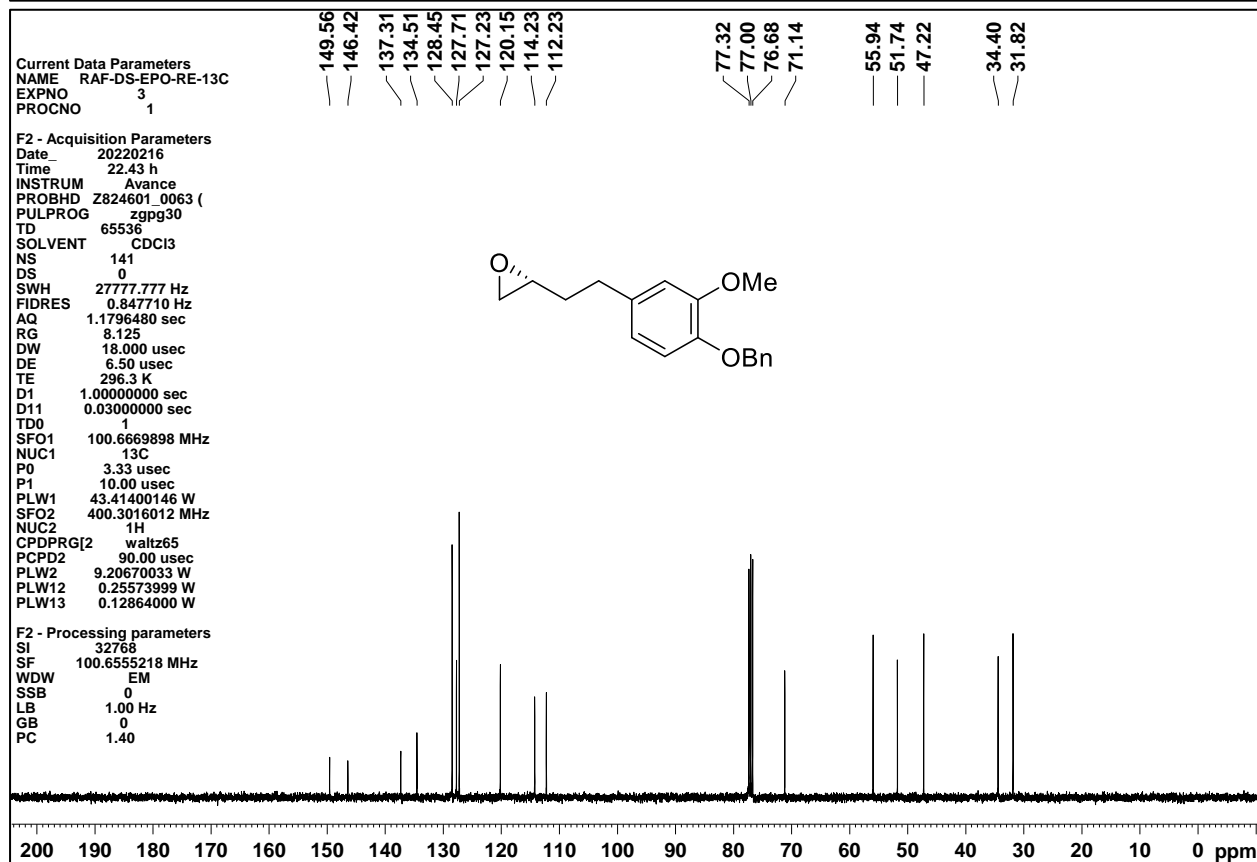

$^1\text{H}$  NMR (400 MHz,  $\text{CDCl}_3$ ) and  $^{13}\text{C}\{^1\text{H}\}$  NMR (100 MHz,  $\text{CDCl}_3$ ) of compound 9

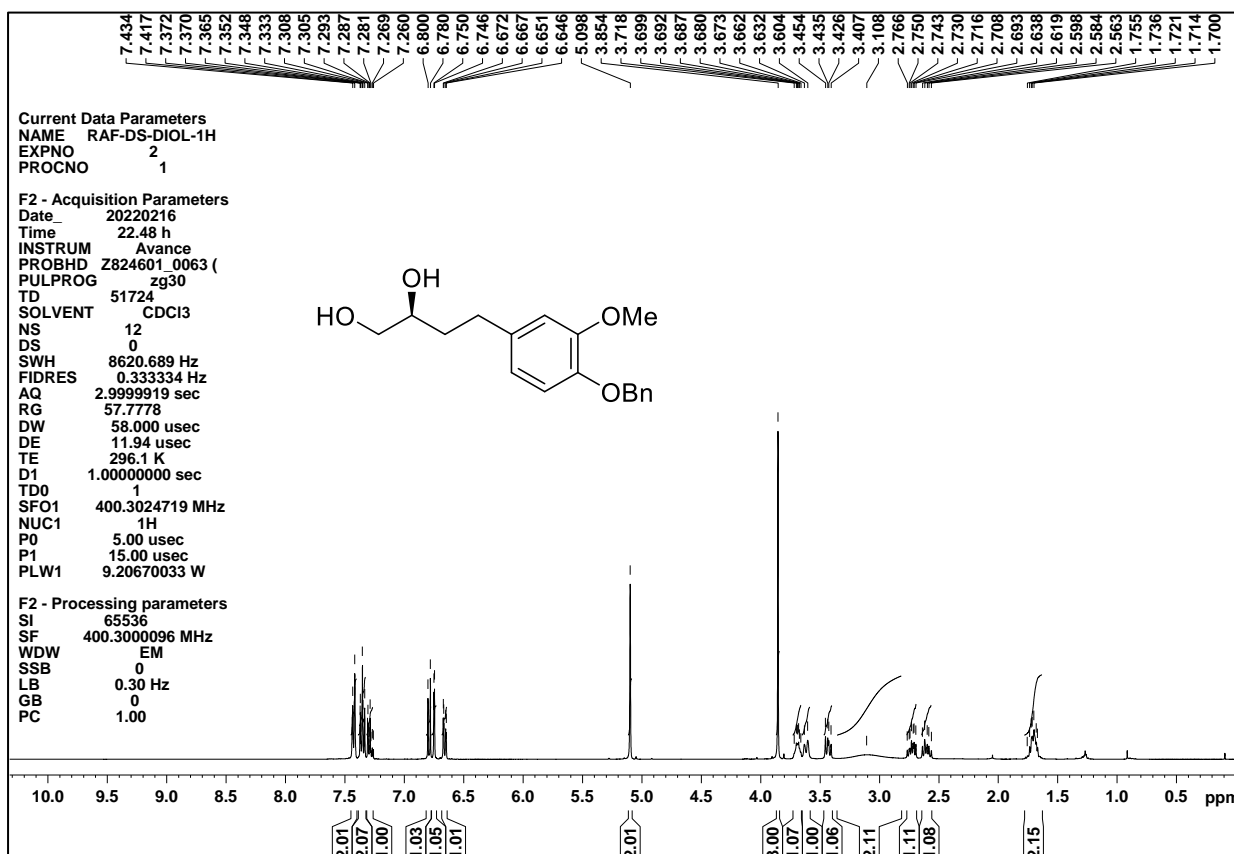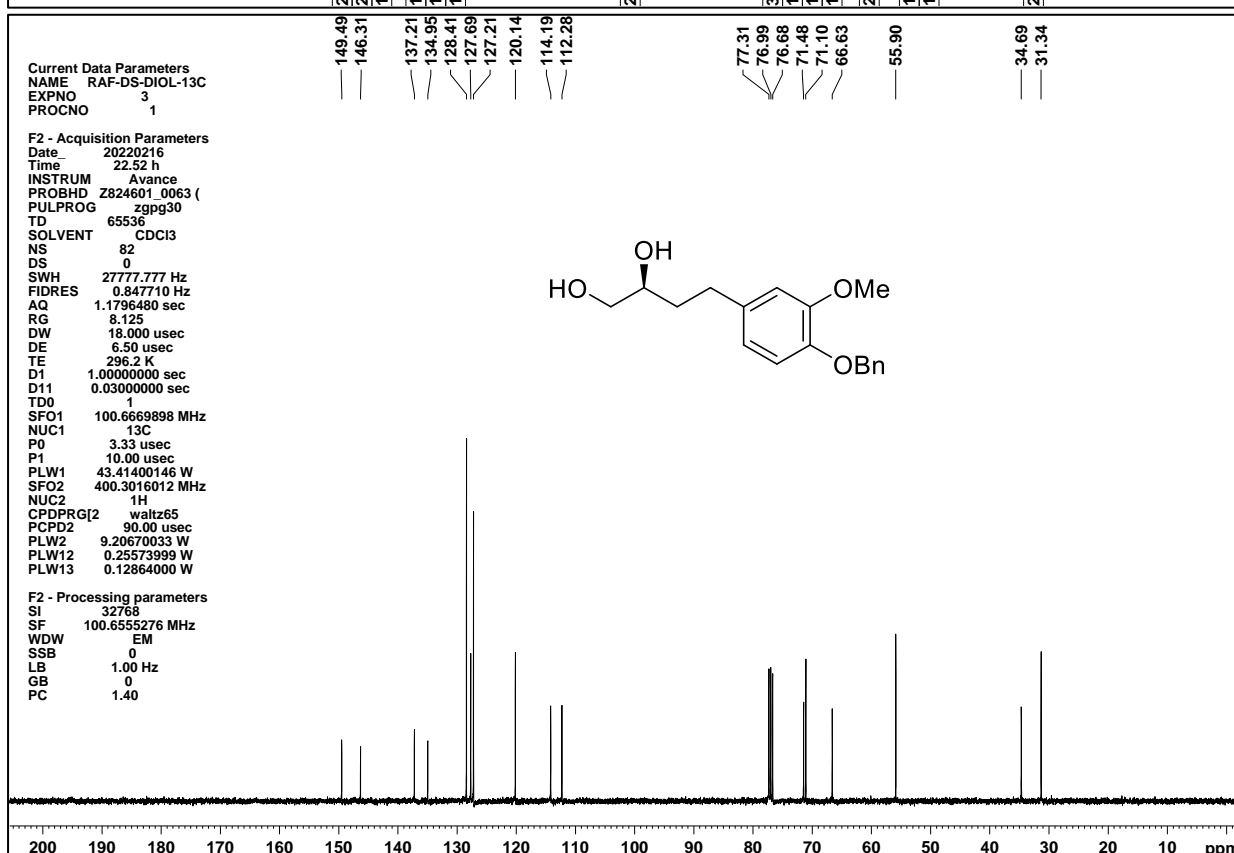

9: HRMS (ESI-TOF)  $m/z$ :  $[M + H]^+$  calcd for  $C_{18}H_{23}O_4$  303.1591, found 303.1583.

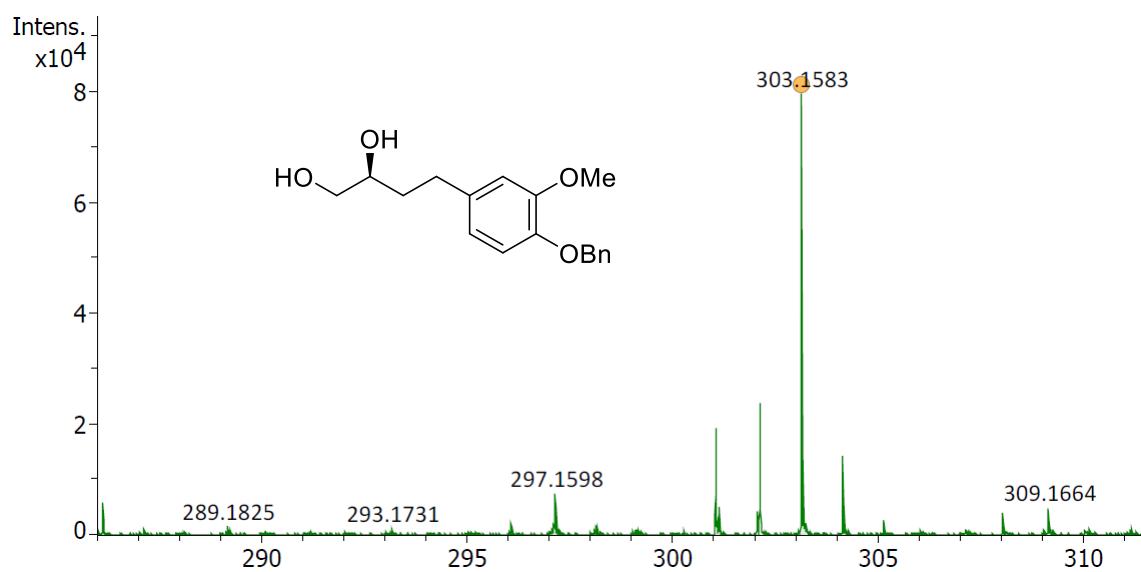

$^1\text{H}$  NMR (400 MHz,  $\text{CDCl}_3$ ) and  $^{13}\text{C}\{^1\text{H}\}$  NMR (100 MHz,  $\text{CDCl}_3$ ) of compound **10**

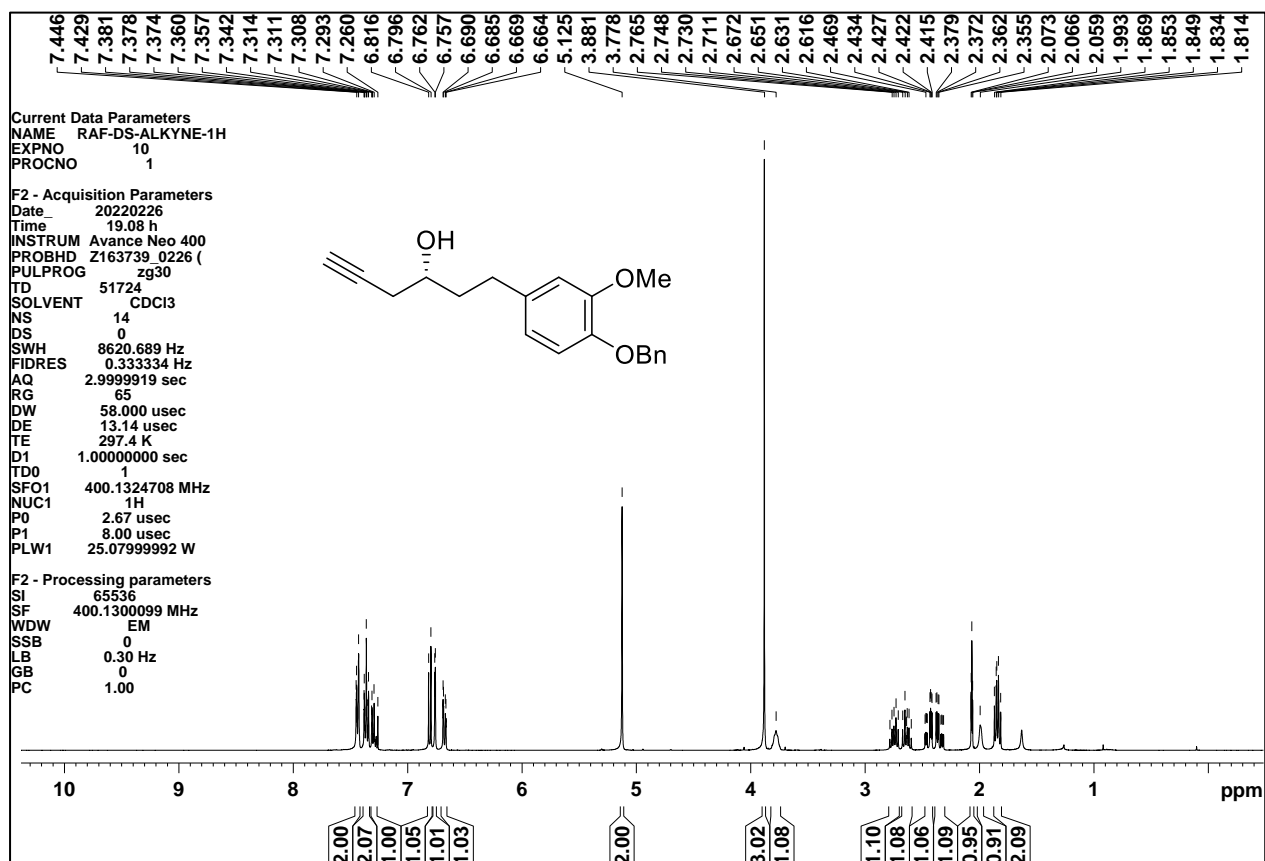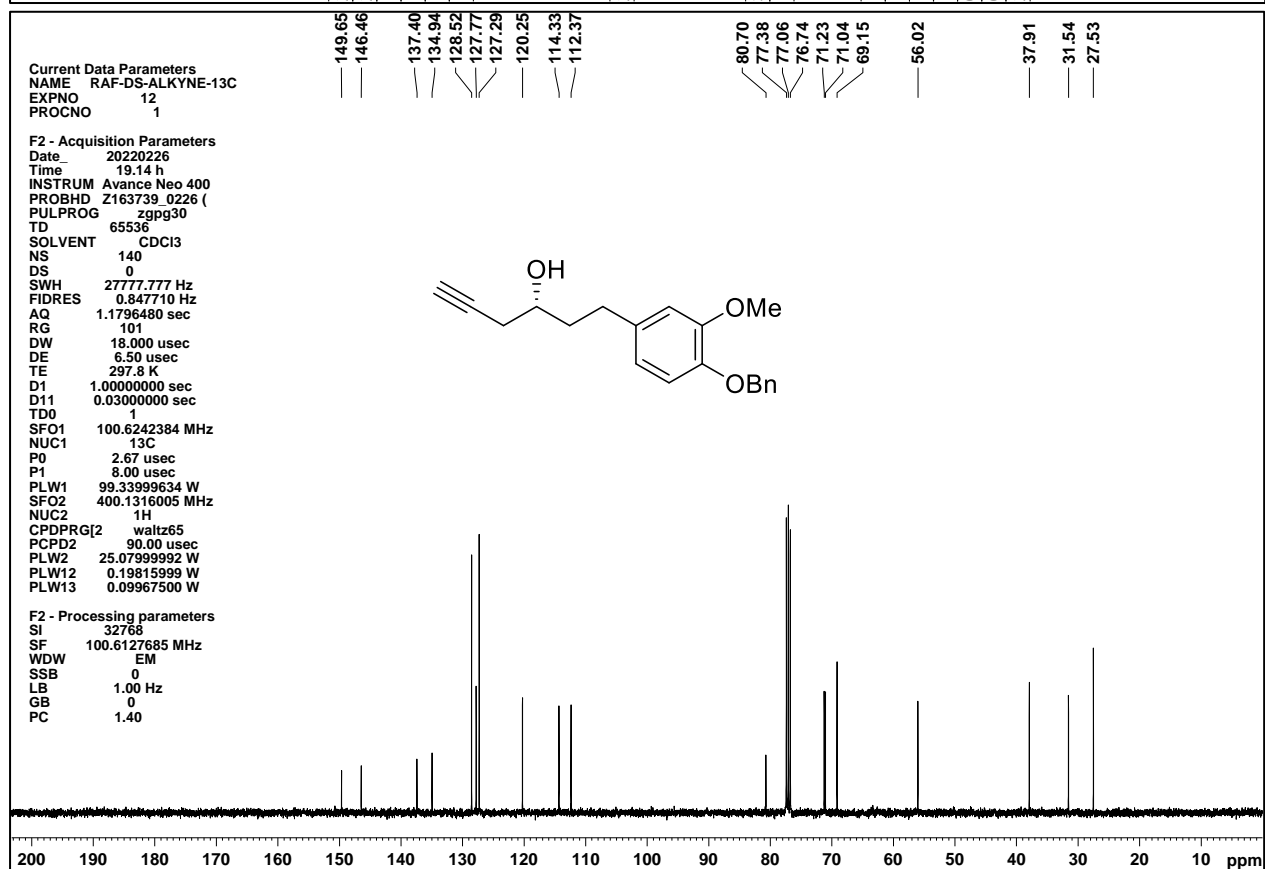

**10:** HRMS (ESI-TOF)  $m/z$ :  $[M+K]^+$  calcd for  $C_{20}H_{22}O_3K$  349.1201, found 349.1197.

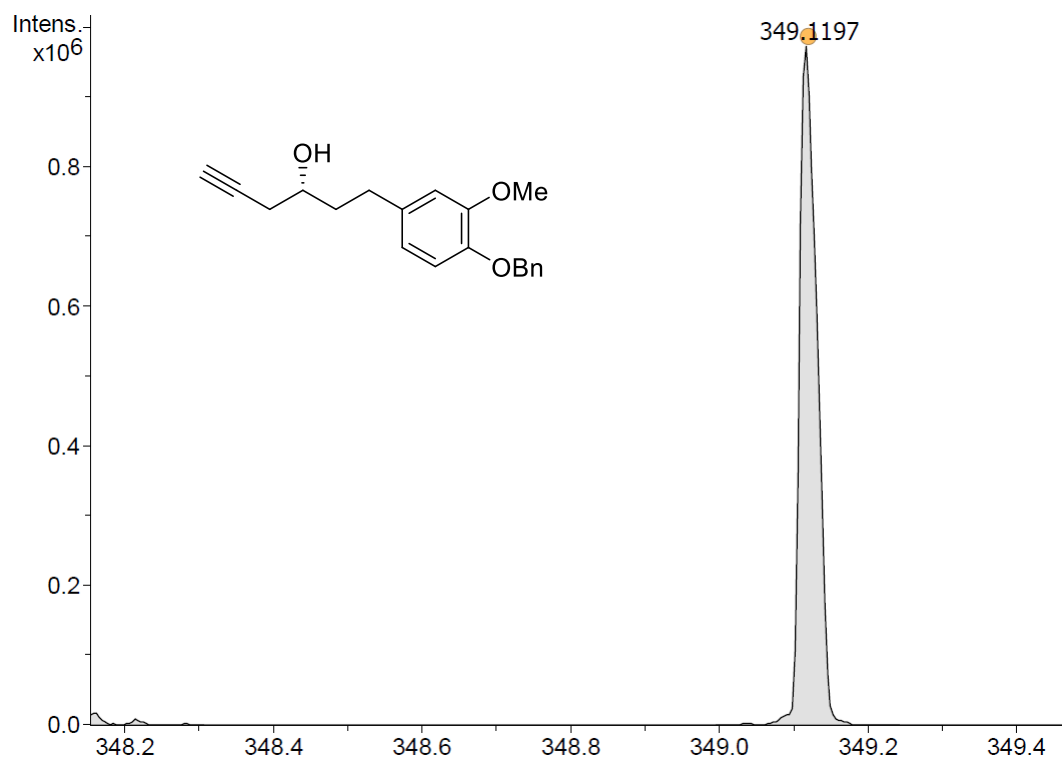

<sup>1</sup>H NMR (400 MHz, CDCl<sub>3</sub>) and <sup>13</sup>C{<sup>1</sup>H} NMR (100 MHz, CDCl<sub>3</sub>) of compound **11**

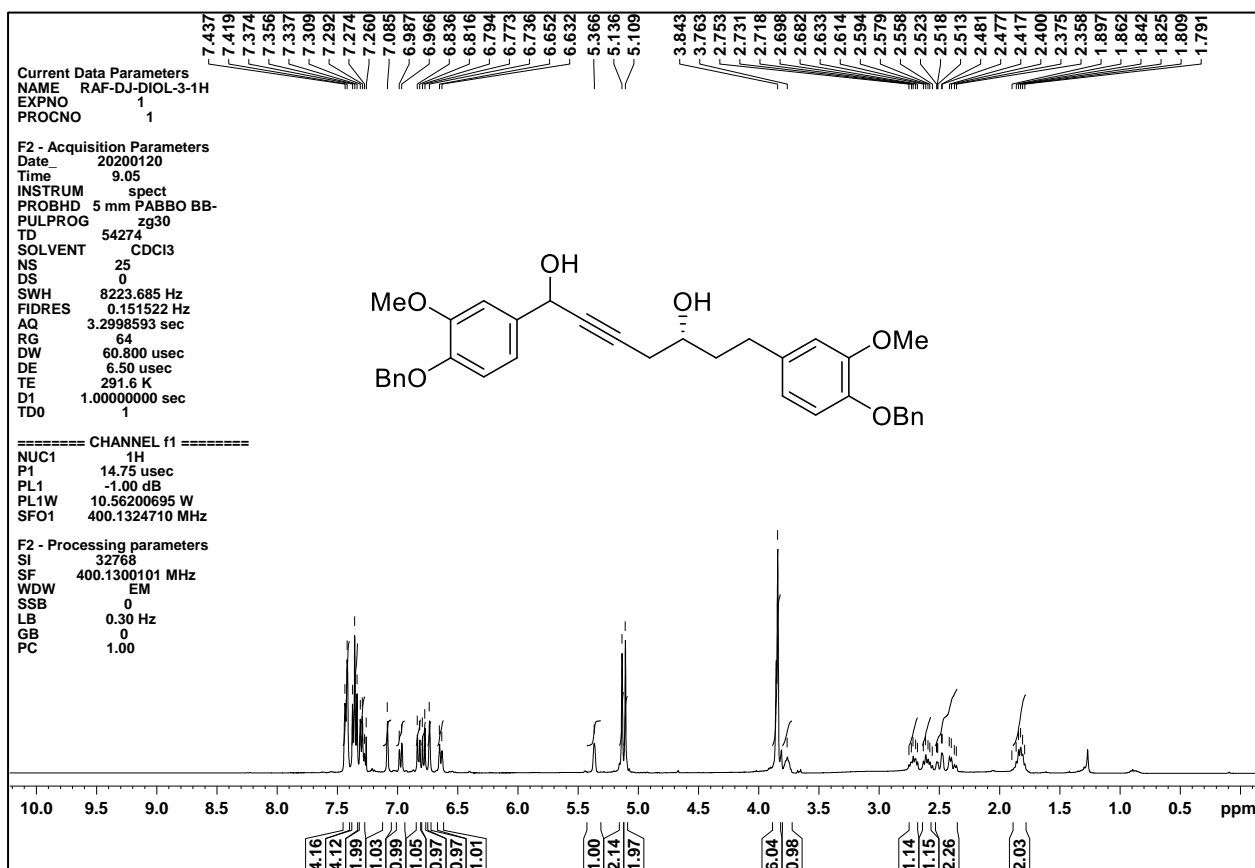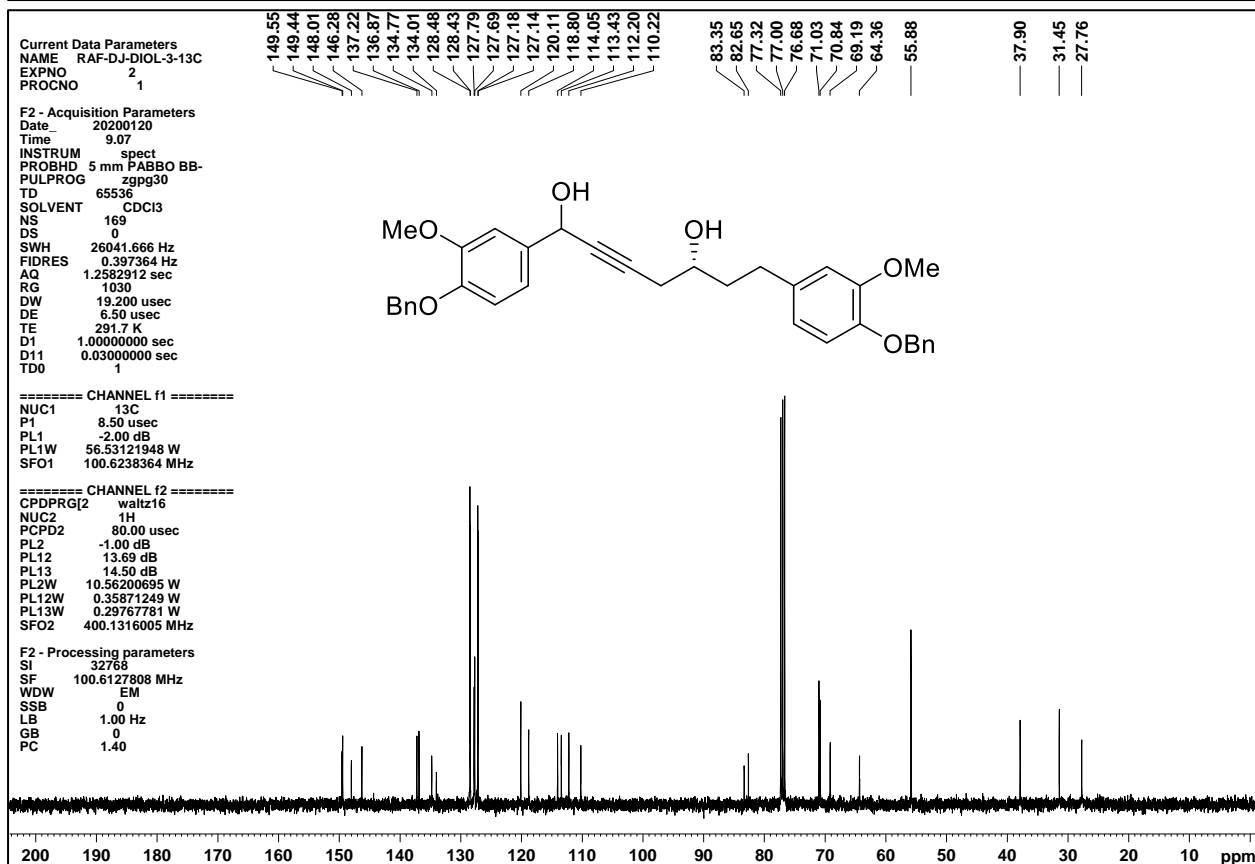

**11:** HRMS (ESI-TOF)  $m/z$ :  $[M + Na]^+$  calcd for  $C_{35}H_{36}O_6Na$  575.2404, found 575.2405.

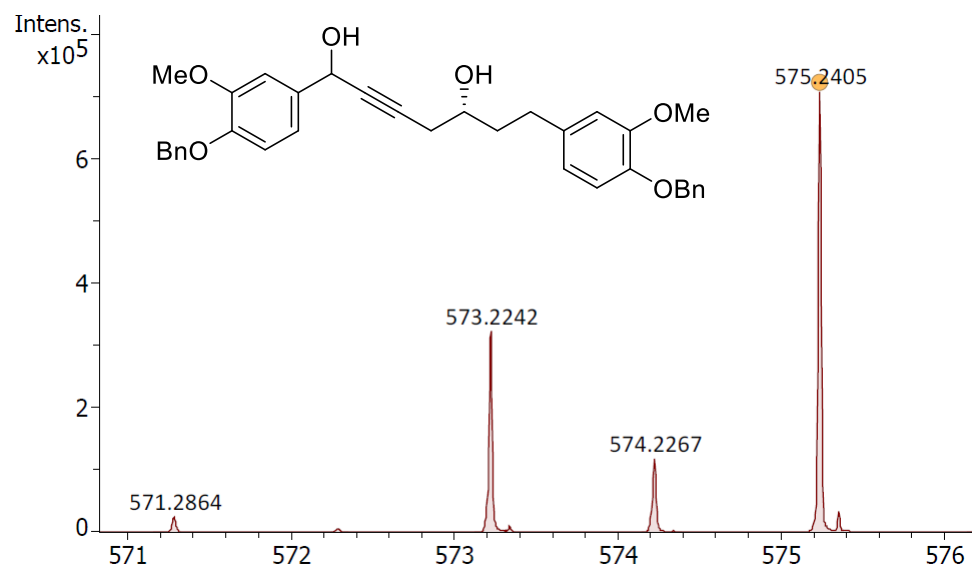



$^1\text{H}$  NMR (400 MHz,  $\text{CDCl}_3$ ) and  $^{13}\text{C}\{^1\text{H}\}$  NMR (100 MHz,  $\text{CDCl}_3$ ) of compound **3**

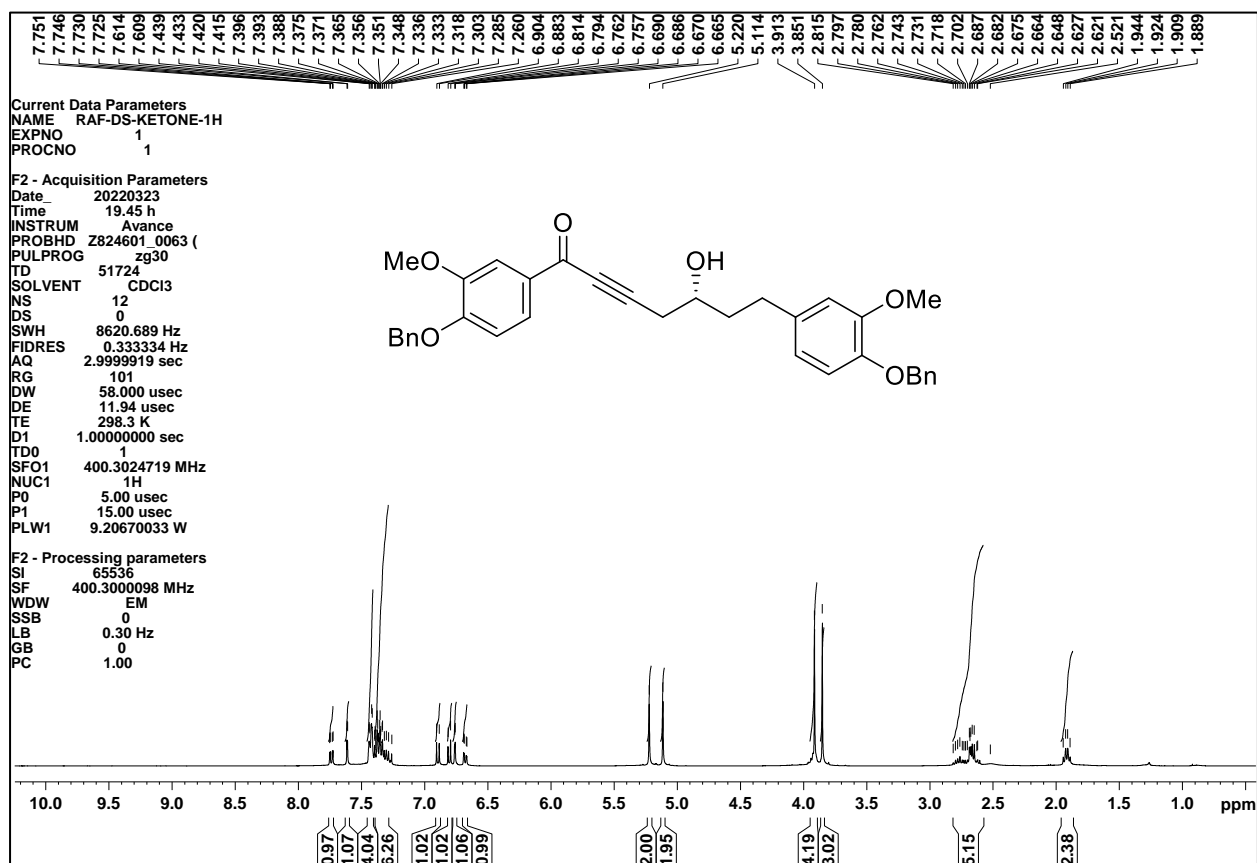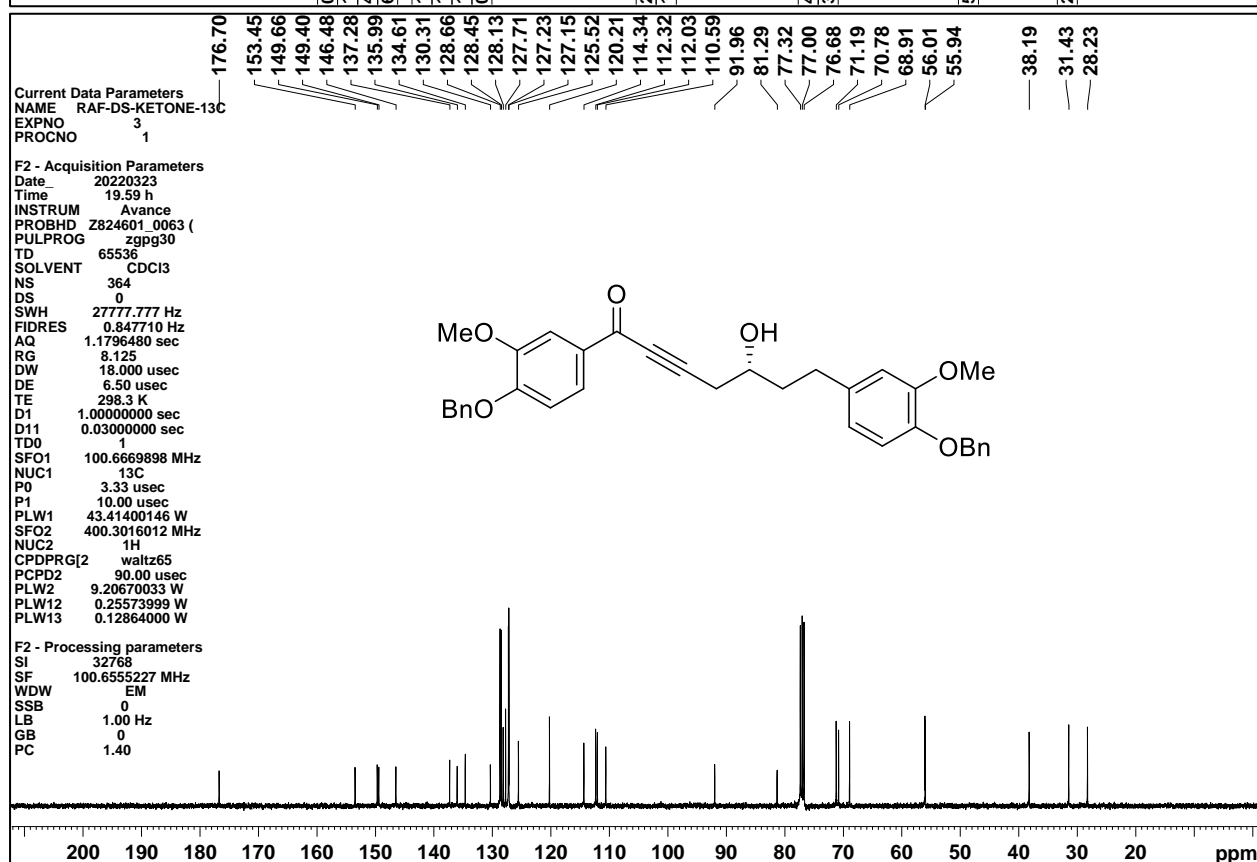

**3:** HRMS (ESI-TOF)  $m/z$ :  $[M + Na]^+$  calcd for  $C_{35}H_{34}O_6Na$  573.2248, found 573.2247.

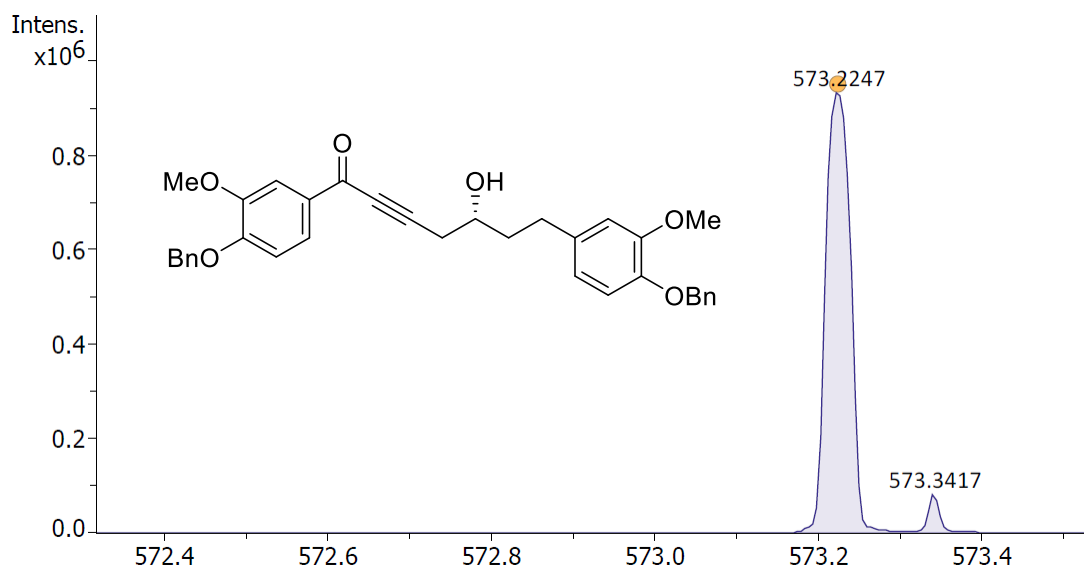

$^1\text{H}$  NMR (400 MHz,  $\text{CDCl}_3$ ) and  $^{13}\text{C}\{^1\text{H}\}$  NMR (100 MHz,  $\text{CDCl}_3$ ) of compound 2

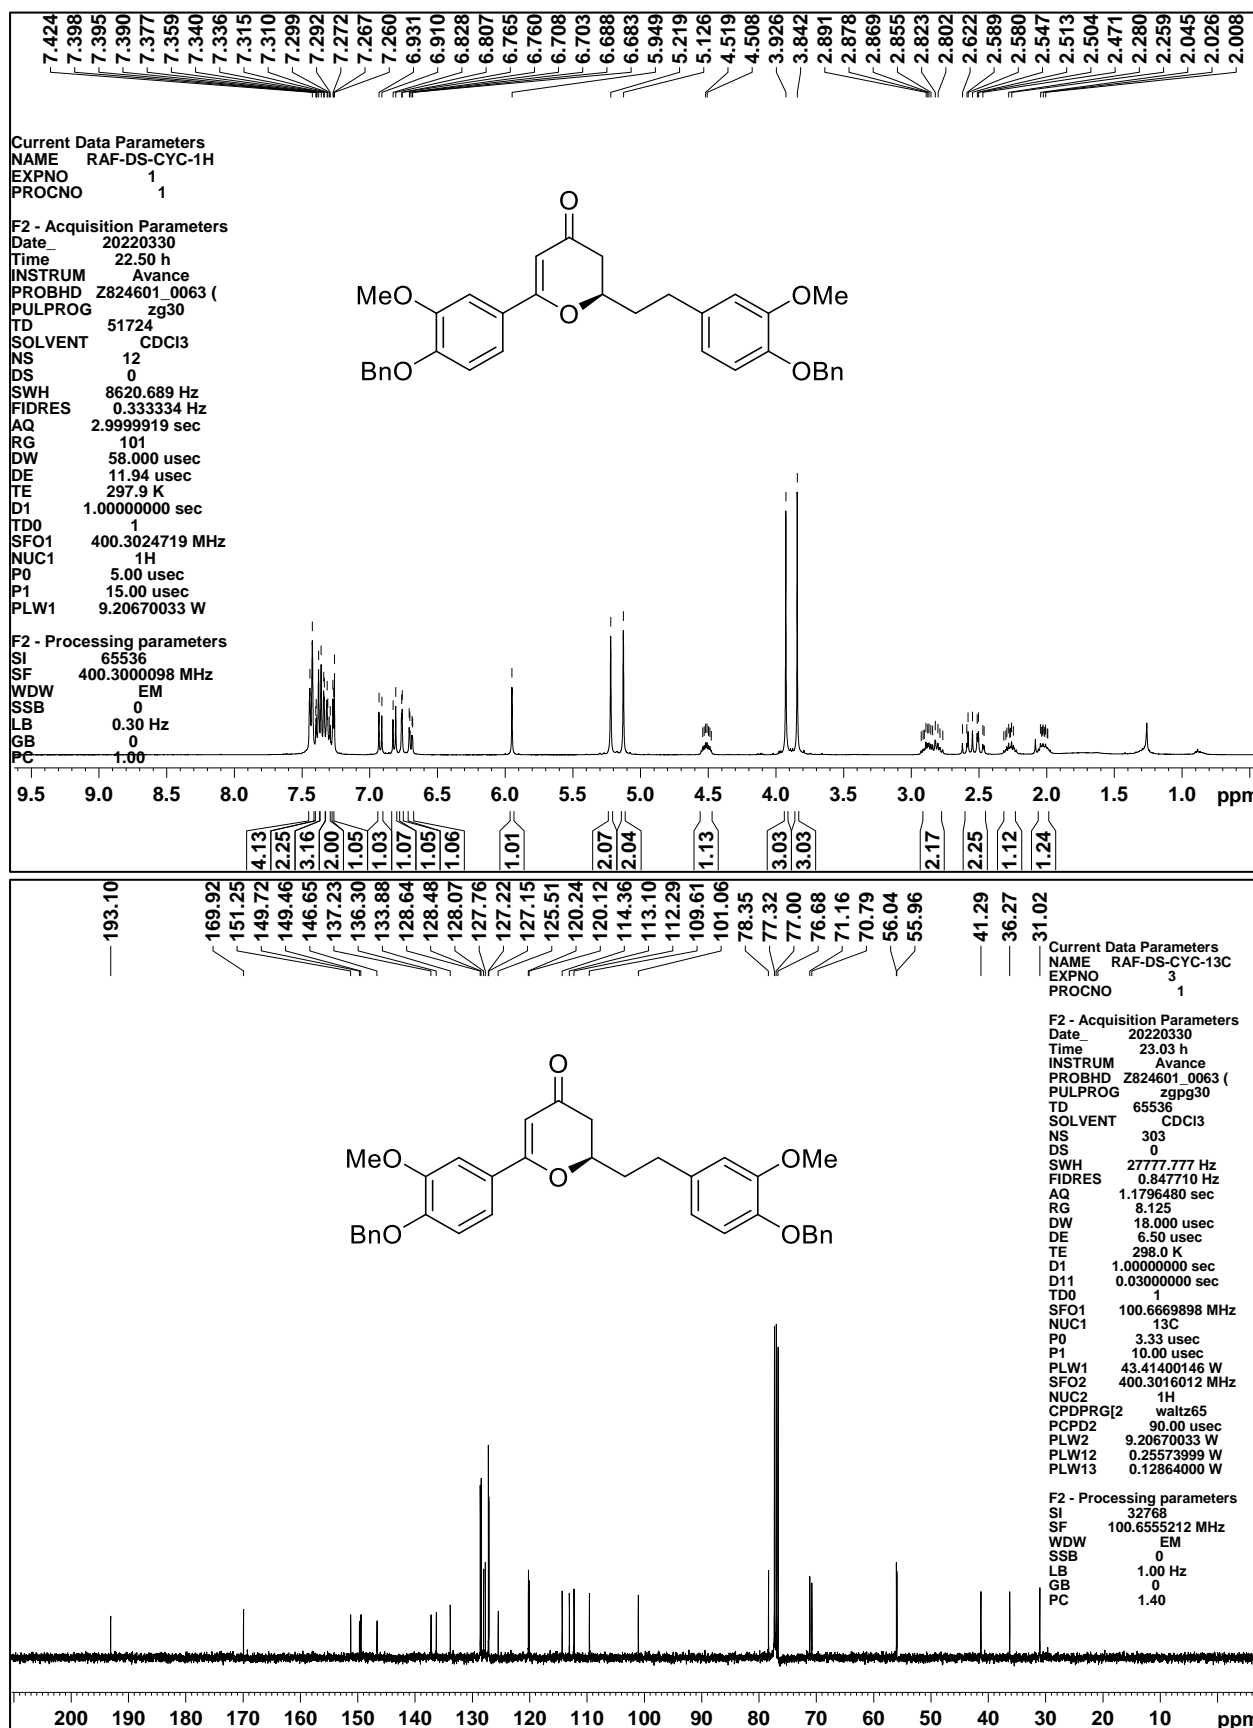

**2:** HRMS (ESI-TOF)  $m/z$ :  $[M + K]^+$  calcd for  $C_{35}H_{34}O_6K$  589.1987, found 589.1992.

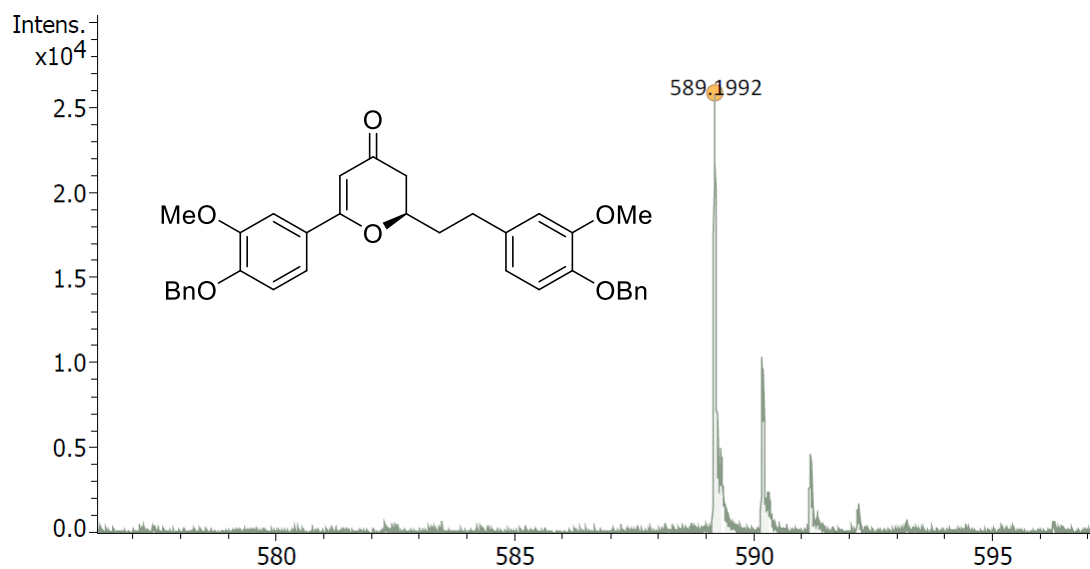

$^1\text{H}$  NMR (400 MHz,  $\text{CD}_3\text{COCD}_3$ ) and  $^{13}\text{C}\{^1\text{H}\}$  NMR (100 MHz,  $\text{CD}_3\text{COCD}_3$ ) of compound **1a**

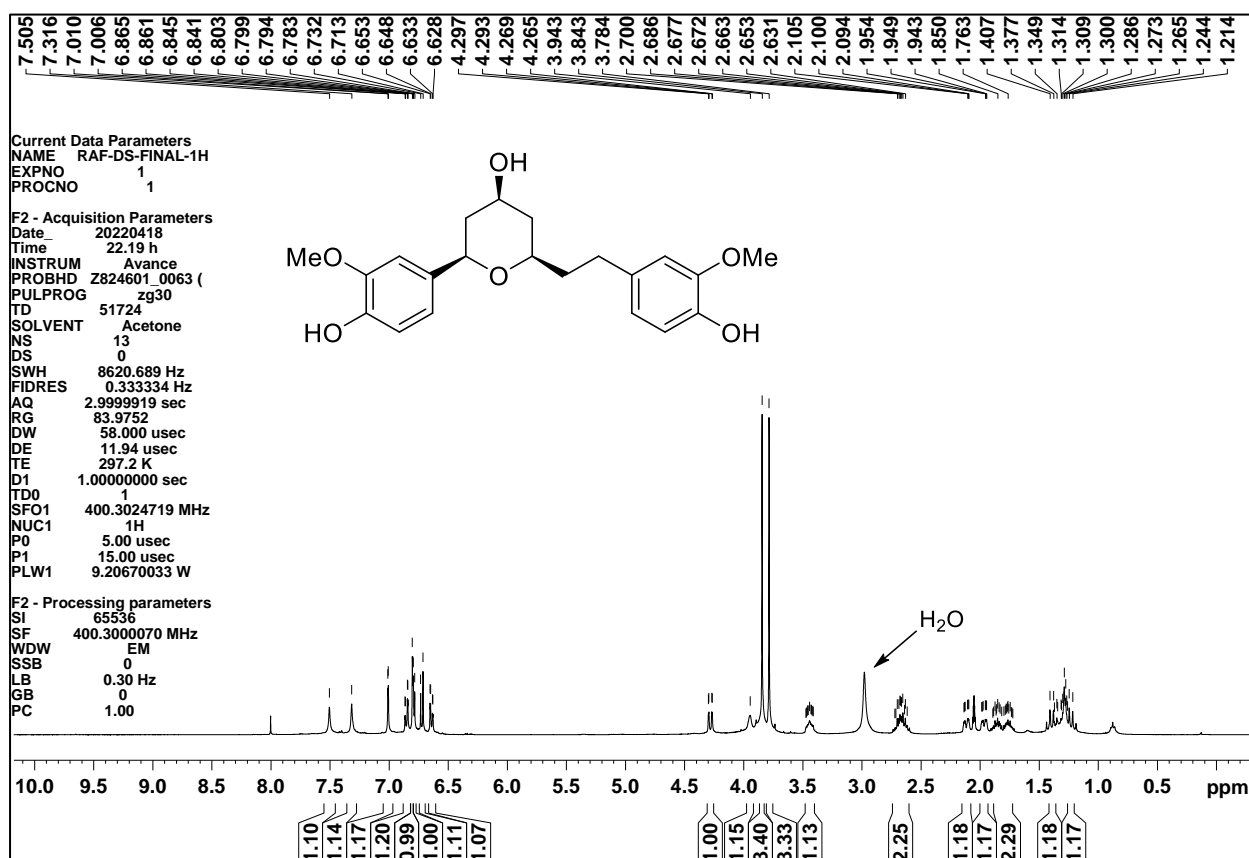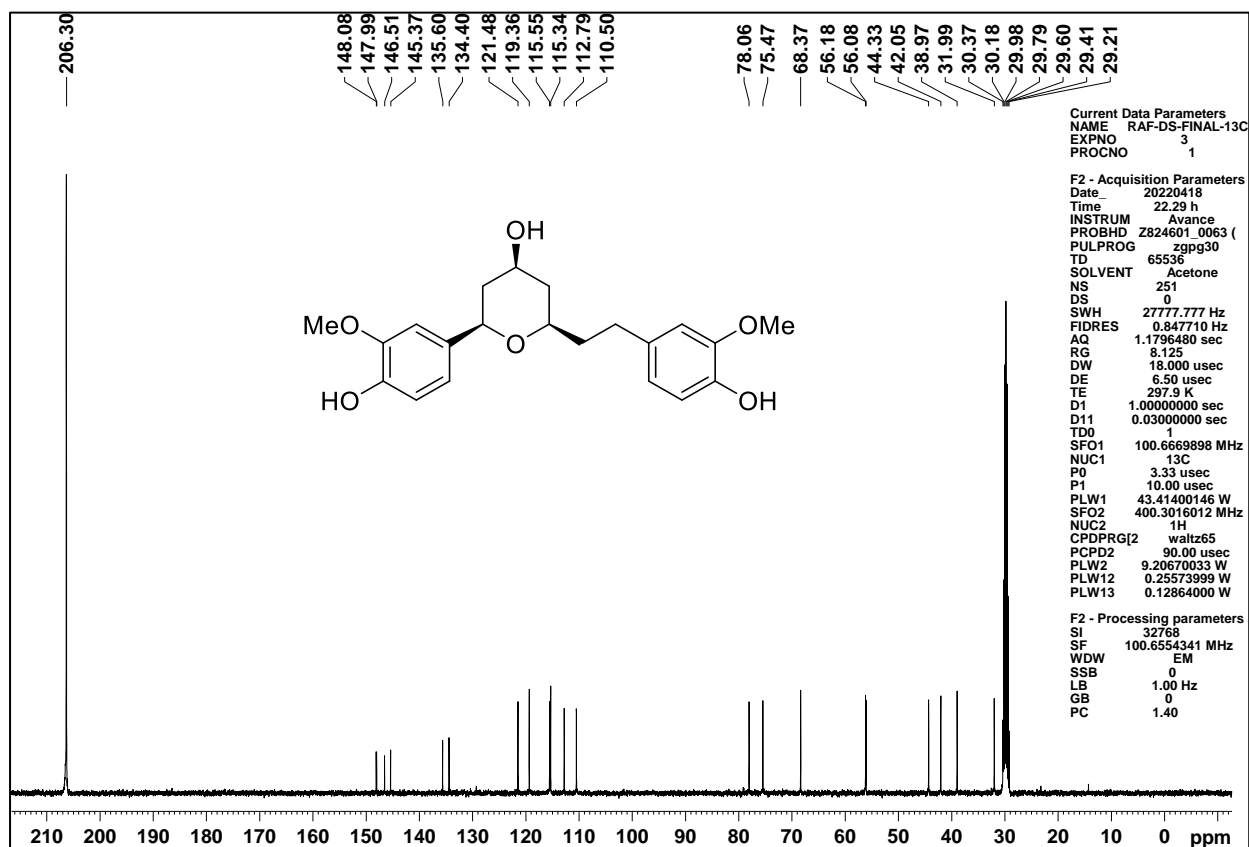

**1a:** HRMS (ESI-TOF)  $m/z$ :  $[M + H]^+$  calcd for  $C_{21}H_{27}O_6$  375.1802, found 375.1797.

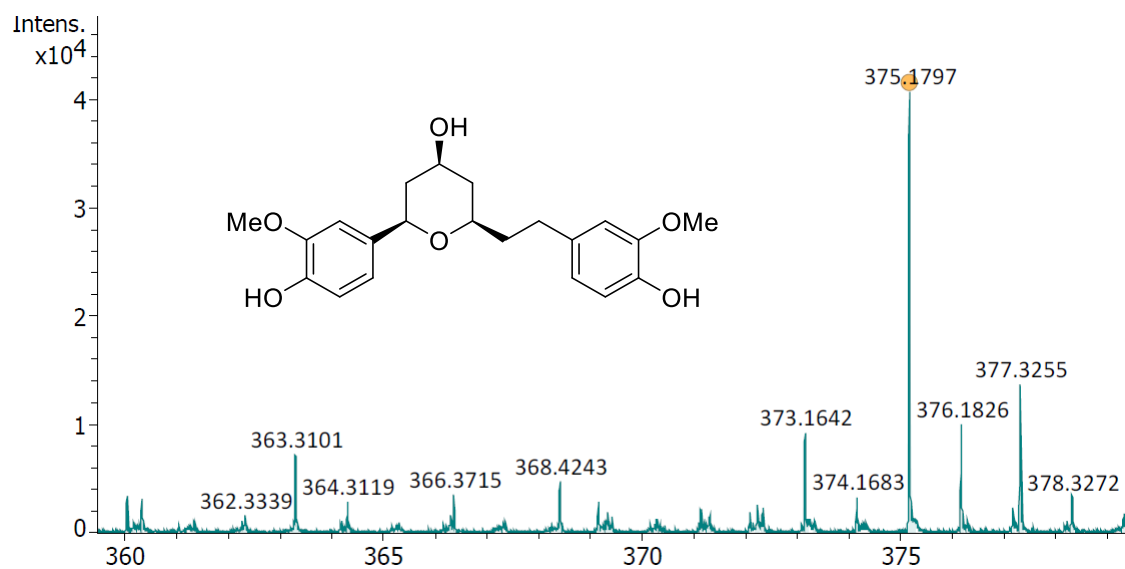

$^1\text{H}$  NMR (400 MHz,  $\text{CD}_3\text{COCD}_3$ ) of  $^{13}\text{C}\{^1\text{H}\}$  NMR (100 MHz,  $\text{CD}_3\text{COCD}_3$ ) of compound **1b**

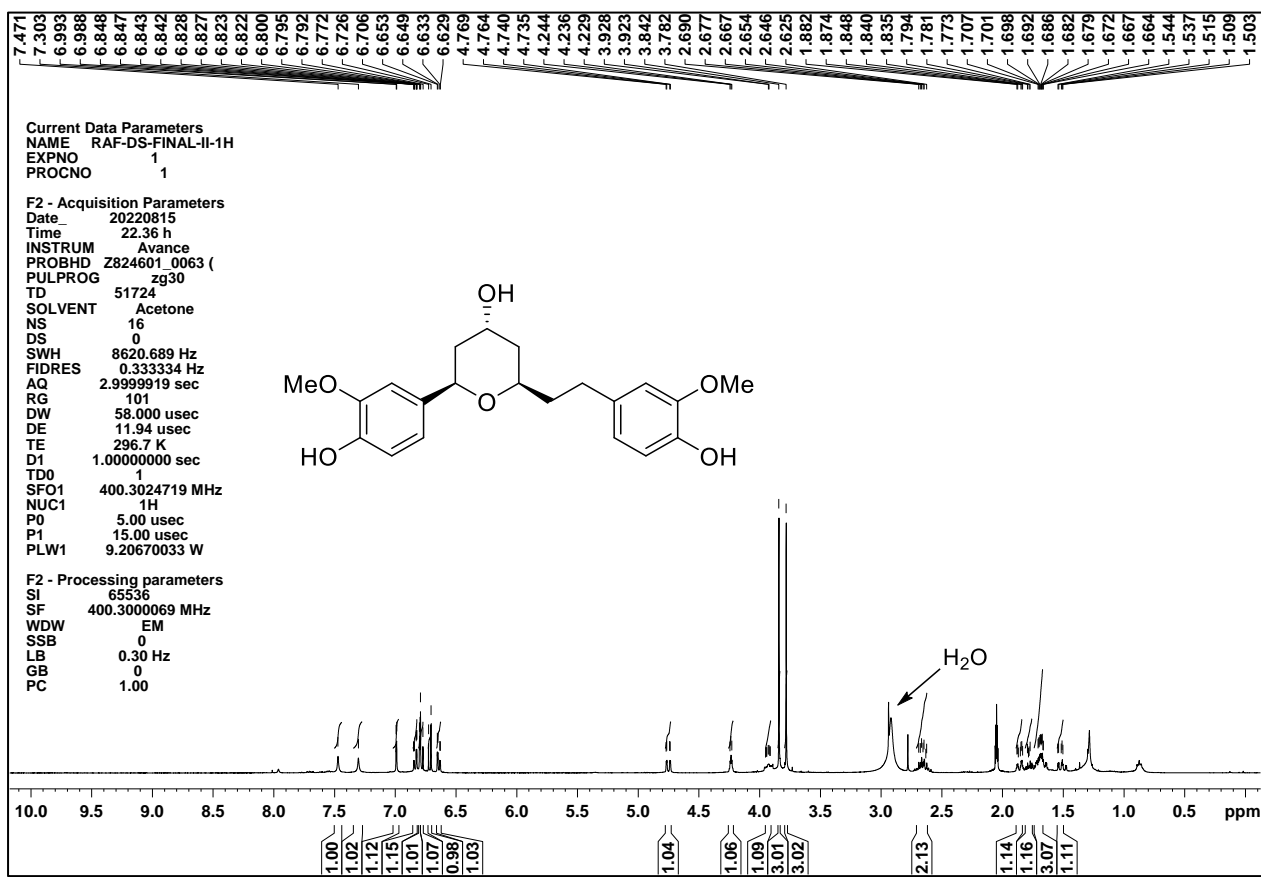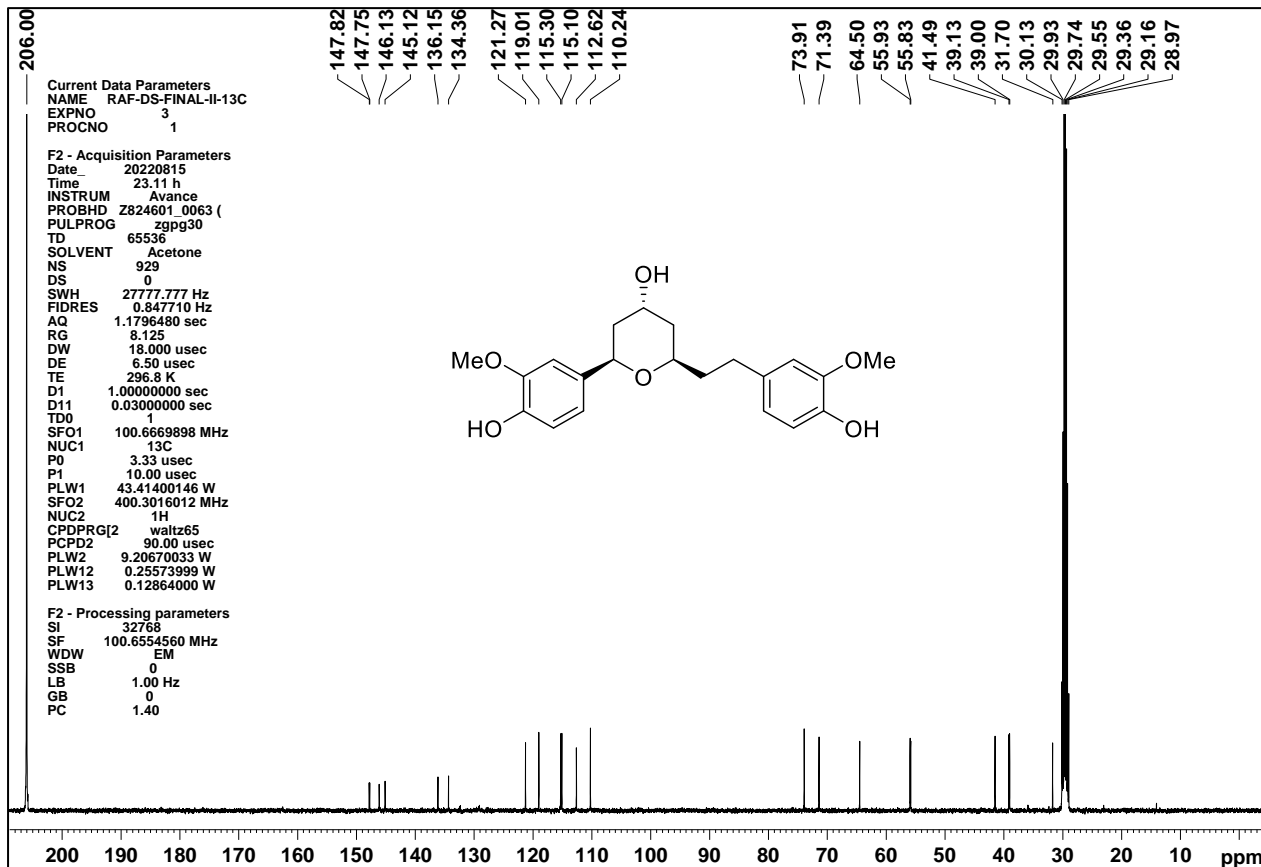

**1b:** HRMS (ESI-TOF)  $m/z$ :  $[M + H]^+$  calcd for  $C_{21}H_{27}O_6$  375.1802, found 375.1800.

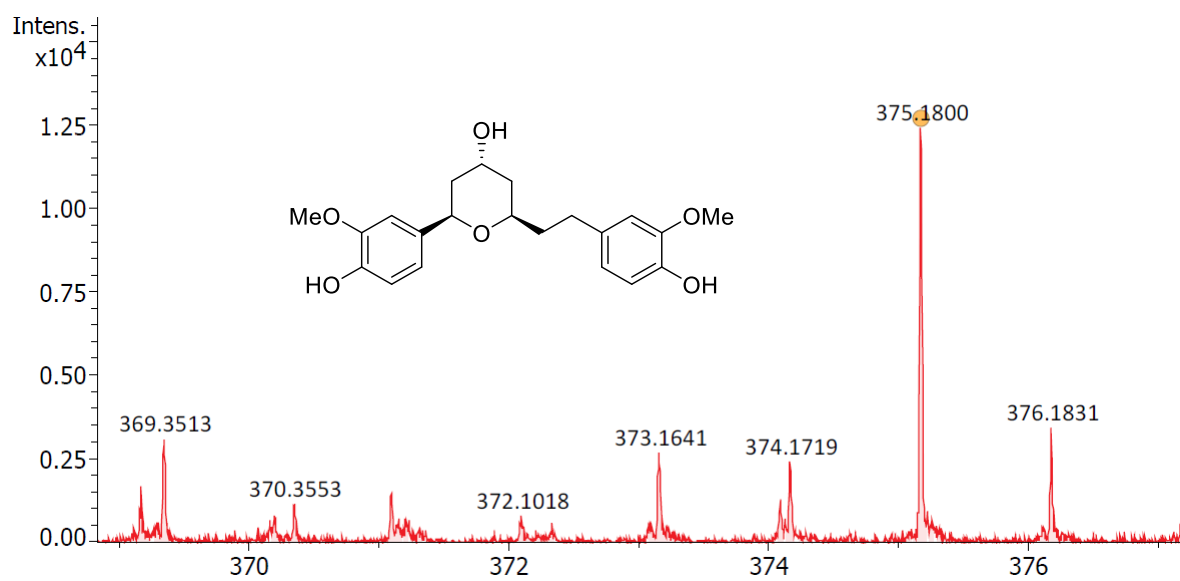

Supplement: d3ob00863k1.pdf [file d3ob00863k1.pdf]
